# Supplementary material for: Identification and characterization of a heterotrimeric archaeal DNA polymerase holoenzyme
Source: PubMed Central journal article supplement (PMC5418573; doi:10.1038/ncomms15075), 2017-05-02
Supplement: ncomms15075-s1.pdf [file ncomms15075-s1.pdf]

**Supplementary Table 1. MAD data collection and phasing statistics of the SSO6202 GdCl<sub>3</sub> soaked crystal.**

**MAD data collection statistics**

| Beamline                      | ID29@ESRF      |                |                 |                |                 |                 |                 |                |                 |
|-------------------------------|----------------|----------------|-----------------|----------------|-----------------|-----------------|-----------------|----------------|-----------------|
| Dataset                       | peak-1         | peak-2         | peak-3          | infl-1         | infl-2          | infl-3          | remote-1        | remote-2       | remote-3        |
| Wavelength (Å)                | 1.71076        |                |                 | 1.71145        |                 |                 | 1.70371         |                |                 |
| Resolution (Å)                | 31.1-2.7       | 31.1-2.6       | 31.1-2.3        | 31.1-2.7       | 31.1-2.7        | 31.1-2.3        | 31.1-2.2        | 31.1-2.7       | 31.1-2.3        |
| Observations                  | 44041          | 37250          | 37250           | 43098          | 35161           | 51973           | 67201           | 36144          | 53150           |
| Unique observations           | 2385<br>(227)  | 2550<br>(170)  | 3478<br>(265)   | 3648<br>(219)  | 2191<br>(184)   | 3463<br>(260)   | 3963<br>(336)   | 2310<br>(189)  | 3524<br>(272)   |
| Rmerge                        | 0.07<br>(0.30) | 0.05<br>(0.29) | 0.05<br>(0.17)  | 0.07<br>(0.29) | 0.05<br>(0.15)  | 0.04<br>(0.13)  | 0.06<br>(0.88)  | 0.05<br>(0.15) | 0.04<br>(0.11)  |
| Rmeas                         | 0.07<br>(0.32) | 0.05<br>(0.36) | 0.05<br>(0.21)  | 0.07<br>(0.31) | 0.05<br>(0.17)  | 0.05<br>(0.17)  | 0.07<br>(0.98)  | 0.07<br>(0.17) | 0.04<br>(0.14)  |
| $\langle I/\sigma(I) \rangle$ | 33.7<br>(8.1)  | 37.4<br>(3.5)  | 37.2<br>(7.3)   | 35.2<br>(8.0)  | 44.5<br>(11.1)  | 42.6<br>(9.7)   | 31.6<br>(1.3)   | 45.1<br>(10.7) | 44.7<br>(12.0)  |
| Completeness %                | 100<br>(100)   | 94.1<br>(69.1) | 95.6<br>(75.7)  | 99.9<br>(99.0) | 98.1<br>(86.4)  | 95.4<br>(74.6)  | 99.0<br>(90.7)  | 97.9<br>(87.0) | 96.0<br>(77.1)  |
| Multiplicity                  | 18.5 (17)      | 14.6<br>(4.6)  | 15.0<br>(4.7)   | 18.4<br>(16.7) | 16.0<br>(7.5)   | 15.0<br>(4.9)   | 17.0<br>(8.7)   | 15.6<br>(6.8)  | 15.1<br>(5.4)   |
| Anomalous multiplicity        | 10.1<br>(9.1)  | 7.9 (2.5)      | 8.1 (2.6)       | 10.1<br>(8.8)  | 8.7 (3.9)       | 8.1 (2.7)       | 9.1 (4.6)       | 8.5 (3.7)      | 8.1 (2.9)       |
| Anomalous completeness        | 100<br>(100)   | 92.7<br>(62.0) | 94.2<br>(69.5)  | 99.8<br>(98.5) | 97.8<br>(85.5)  | 94.1<br>(67.8)  | 98.6<br>(87.6)  | 97.2<br>(82.0) | 94.8<br>(73.6)  |
| Dano CC                       | 0.82<br>(0.08) | 0.86<br>(0.11) | 0.88<br>(-0.02) | 0.61<br>(0.03) | 0.68<br>(-0.07) | 0.73<br>(-0.14) | 0.42<br>(-0.22) | 0.53<br>(0.08) | 0.61<br>(-0.05) |

**Supplementary Table 2. SHARP phasing statistics for resolution 31.1- 2.2 Å  
(in parenthesis values up to 6.6 Å)**

| Dataset      | Phasing Power<br>(isomorphous) |                | Phasing Power<br>(anomalous) | FOM              |                  |
|--------------|--------------------------------|----------------|------------------------------|------------------|------------------|
|              | Acentrics                      | Centrics       |                              | Acentrics        | Centrics         |
| Peak-1       | -                              | -              | 2.87 (5.15)                  | -                | -                |
| Peak-2       | -                              | -              | 2.92 (6.22)                  | -                | -                |
| Peak-3       | -                              | -              | 2.93 (4.90)                  | -                | -                |
| Inflection-1 | 0.52<br>(1.81)                 | 0.63<br>(1.32) | 1.44 (3.19)                  | -                | -                |
| Inflection-2 | 1.15<br>(2.79)                 | 1.46<br>(2.36) | 1.82 (3.49)                  | -                | -                |
| Inflection-3 | 0.65<br>(2.12)                 | 0.79<br>(1.66) | 1.71 (3.13)                  | -                | -                |
| Remote-1     | 0.37<br>(1.58)                 | 0.52<br>(1.35) | 1.31 (4.82)                  | -                | -                |
| Remote-2     | 1.23<br>(3.81)                 | 1.61<br>(2.64) | 1.98 (5.28)                  | -                | -                |
| Remote-3     | 0.51<br>(1.71)                 | 0.65<br>(1.48) | 2.07 (5.11)                  | -                | -                |
| Overall      |                                |                |                              | 0.300<br>(0.765) | 0.498<br>(0.939) |

**Supplementary Table 3. Oligonucleotides used in this study.**

| Oligo Name           | Sequence (5' to 3')                                                                  |
|----------------------|--------------------------------------------------------------------------------------|
| PolB1_For            | CATGACCCATGGCTAAGCAACTTACCTTATTTG                                                    |
| PolB1_Rev            | CATGACCTCGAGTTAACTATTTCTTTACTTGGGTATG                                                |
| PolB1_notag mutation | CCCAAGTAAAGGAAATAGTTAACTCGAGCACCACCACCACC<br>ACCACTGAGAT                             |
| PBP1_For             | CATGACCATATGTCAACGAGATGGCTACC                                                        |
| PBP1_Rev             | CATGACCTCGAGCGTAAATCCTCCTACTATTAATATCTTAC                                            |
| PBP2_For             | CATGACCATATGTCTGTTAATCAGAAGGAAATTG                                                   |
| PBP2_Rev             | CATGACCTCGAGCTTCTTGTCTAGTAGATTTCTCTCAC                                               |
| PolB1_LD/KK          | ACTAAAAACAAAGGATACAATAAGAAGGAATTAGCGTTTA<br>AAGTAATGC                                |
| PolB1_LD/AA          | ACTAAAAACAAAGGATACAATGCGGCCGAATTAGCGTTTA<br>AAGTAATGC                                |
| PolB1_Thumb_For      | GATACCATGGGCATGTTAGTGAAGAAGAGAAAC                                                    |
| PolB1_Thumb_Rev      | GCACGTCGACTTAACTATTTCTTTACTTGGGTA                                                    |
| Template_long        | TTAAAGTTAGGTGGCGGACTCTGCCTCAAATCGTGTAATGAT<br>GCCATGCGACCTCTGACAACGTGACCGCAGCCCACCTG |
| Template mismatch    | TTAAAGTTAGGTGGCGGACTCTGCCTCAAATCGTGTAATGAT<br>GCCATGCAACCTCTGACAACGTGACCGCAGCCCACCTG |
| Template_short       | TTAAAGTTAGGTGGGGGACTCTGCCTCAAGACCTCTGACAA<br>CGTGACCGCAGCCCACCTG                     |
| Cy5 primer           | Cy5/CAGGTGGGCTGCGGTCACGTTGTCAGAGGTC                                                  |
| Top_DNA              | TTGAGGCAGAGTCCGCCACCTAACTTTAA                                                        |
| Top_hybrid           | rUrUrGrArGrGrCrArGrAGTCCGCCACCTAACTTTAA                                              |
| Top_hybrid Cy3       | rUrUrGrArGrGrCrArGrAGTCCGCCACCTAACTTTAA/Cy3                                          |
| Templ_complementary  | CAGGTGGGCTGCGGTCACGTTGTCAGAGGTCTTGAGGCAGA<br>GTCCGCCA                                |
| EM oligo1            | ACAGGTAAGCAGTCCGCG                                                                   |
| EM oligo2            | GCGGACTGCTTACDDC                                                                     |
| FA_label             | [6FAM]CAGGTGGGCTGCGGTCACGTTGTCAGAGGTC                                                |
| FA_template          | GTGTAATGATGCCATGCGACCTCTGACAACGTGACCGCAGC<br>CCACCTG                                 |

**Supplementary Table 4. Accession numbers for PolB1 sequences in Supplementary Figure 7a. SSOPolB2 and SSOPolB3 are included.**

| <b>Protein</b> | <b>Species</b>                        | <b>Accession Number</b> |
|----------------|---------------------------------------|-------------------------|
| SSOPolB3       | <i>Sulfolobus solfataricus</i>        | WP_009988892.1          |
| SSOPolB2       | <i>Sulfolobus solfataricus</i>        | WP_009989138.1          |
| ASA            | <i>Acidilobus saccharovorans</i>      | WP_013266050.1          |
| FFO            | <i>Fervidicoccus fontis</i>           | AFH42863.1              |
| IGIS           | <i>Ignicoccus islandicus</i>          | WP_075050453.1          |
| IGHO           | <i>Ignicoccus hospitalis</i>          | WP_011998724.1          |
| THCE           | <i>Thermogladius cellulolyticus</i>   | WP_014737097.1          |
| SMAR           | <i>Staphylothermus marinus</i>        | WP_011839163.1          |
| SHEL           | <i>Staphylothermus hellenicus</i>     | WP_013143881.1          |
| THAG           | <i>Thermosphaera aggregans</i>        | WP_013130178.1          |
| DEMU           | <i>Desulfurococcus mucosus</i>        | WP_013562821.1          |
| DEFE           | <i>Desulfurococcus fermentans</i>     | WP_014768161.1          |
| DEKA           | <i>Desulfurococcus kamchatkensis</i>  | WP_052290773.1          |
| PYFU           | <i>Pyrolobus fumarii</i>              | WP_014027250.1          |
| MEYE           | <i>Metallosphaera yellowstonensis</i> | WP_009075591.1          |
| MECU           | <i>Metallosphaera cuprina</i>         | WP_013736984.1          |
| MESE           | <i>Metallosphaera sedula</i>          | WP_048060164.1          |
| ACHO           | <i>Acidianus hospitalis</i>           | WP_048054919.1          |
| SSOPolB1       | <i>Sulfolobus solfataricus</i>        | WP_009991059.1          |
| SIS            | <i>Sulfolobus islandicus</i>          | WP_012711569.1          |
| STO            | <i>Sulfolobus tokodaii</i>            | WP_010979471.1          |
| SAC            | <i>Sulfolobus acidocaldarius</i>      | WP_011278353.1          |

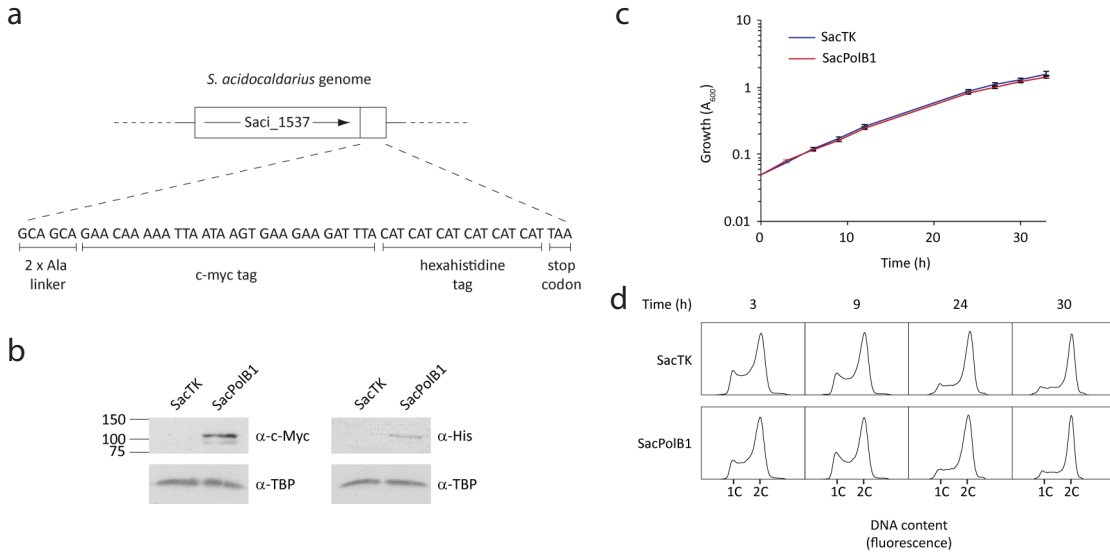

**Supplementary Figure 1. Characterization of a *S. acidocaldarius* strain in which the gene for PolB1 (*saci\_1537*) is modified with a dual affinity tag.**

(a) Schematic of chromosomal modification of the gene for *S. acidocaldarius* PolB1 (*Saci\_1537*). The endogenous gene was replaced by a copy containing the additional 3' sequences illustrated in the expanded view.

(b) Western blot analysis using anti-c-Myc and anti-his-tag antibodies of parental (SacTK) and modified (SacPolB1) strains to confirm the expression of the dual-tagged protein. TBP was used as a loading control.

(c) Comparison of growth of parental (SacTK) and modified (SacPolB1) strains over time, measured by absorbance at 600 nm. The scale on the y-axis is logarithmic.

(d) FACS analysis of the two strains above at the indicated time points. 1C and 2C indicate the 1 and 2 chromosome content cell populations.

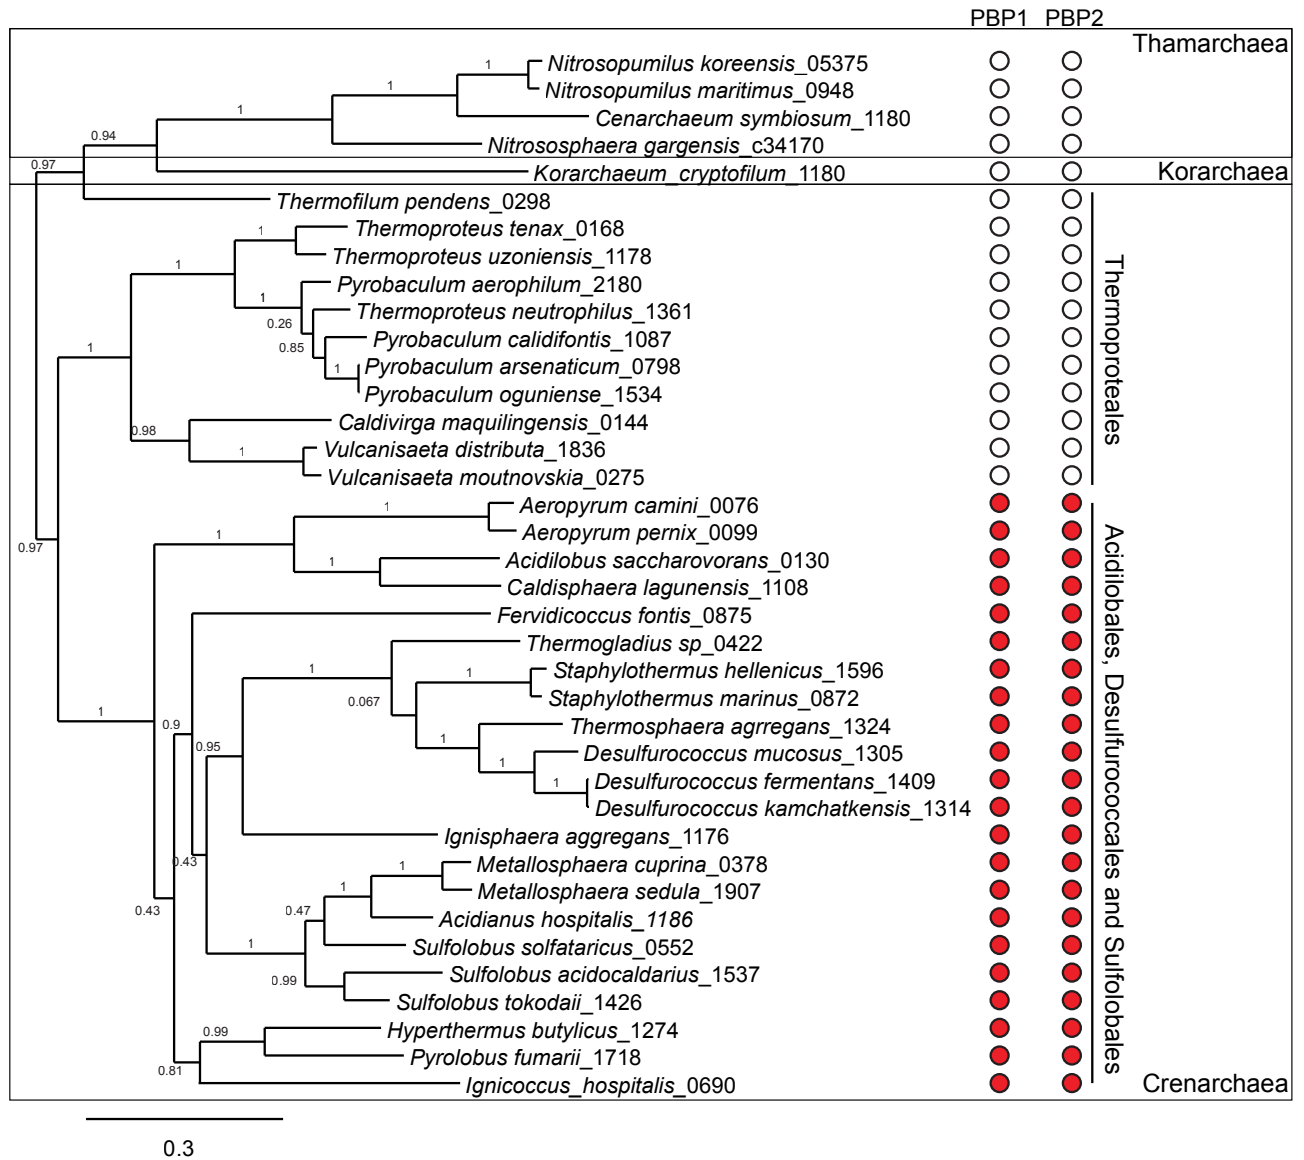

### Supplementary Figure 2. Conservation of PBP1 and PBP2.

Phyletic distribution of PBP1 and PBP2 superimposed on a phylogenetic tree of PolB1 orthologs from the indicated archaeal species. The tree was generated using the phylogeny webserver<sup>1,2</sup>. Red circles indicate the presence of PBP1 or PBP2 orthologs in that species, open circles indicate the lack of detectable homologs.

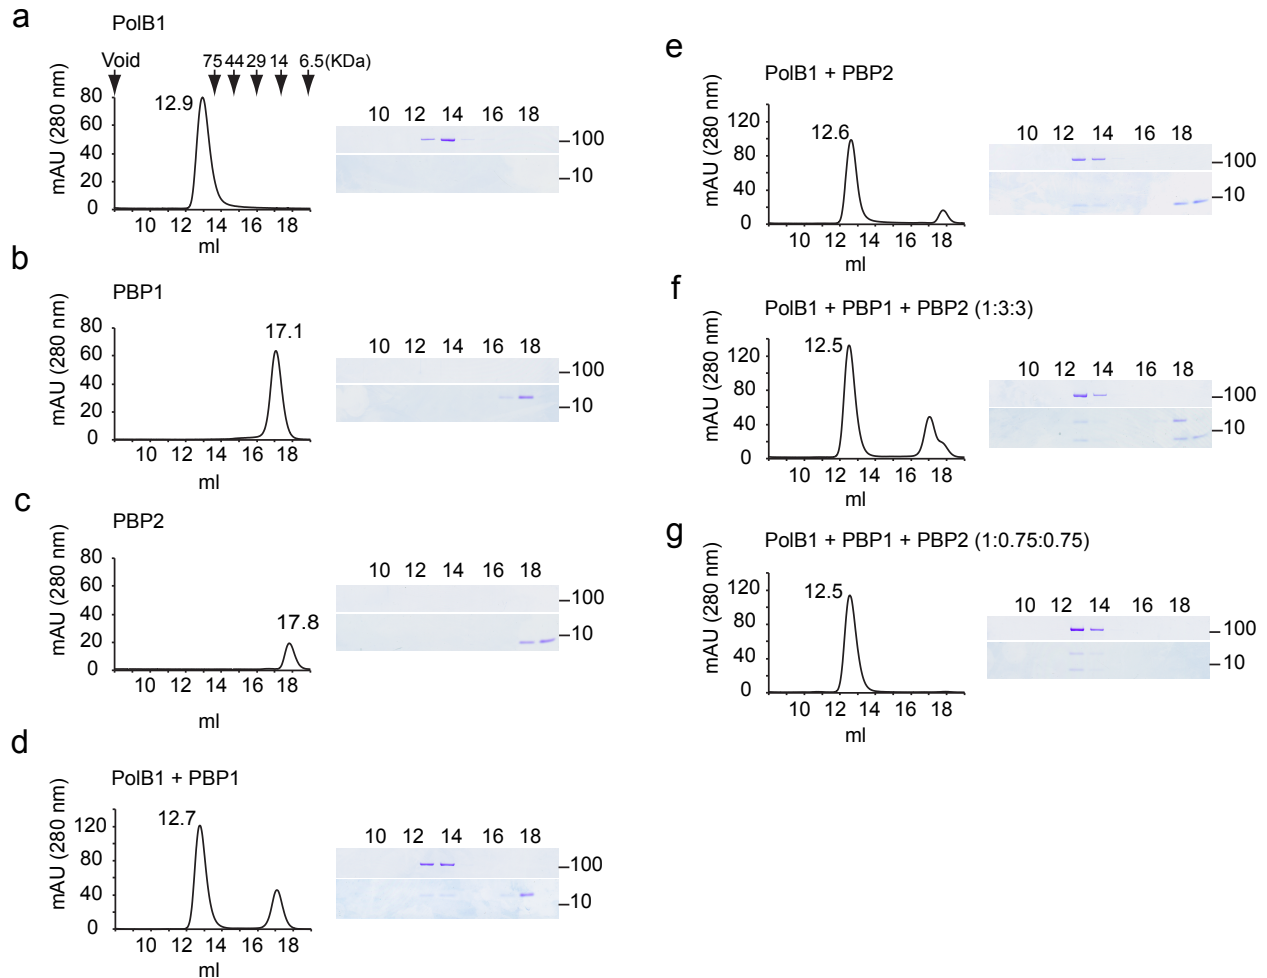

**Supplementary Figure 3. Formation of complexes of PolB1 with PBP1 and/or PBP2** . Analytical gel filtration of the indicated proteins and complexes on a Superdex 200 HR 10/300 column. Protein elution was monitored by UV absorbance (280 nm) and the peak elution volume in milliliters is indicated adjacent to the peak. Fractions were also analyzed by gel filtration; size markers are indicated to the right of the panels. Samples were

- (a) 0.8 nmol PolB1
- (b) 2.4 nmol PBP1
- (c) 2.4 nmol PBP2
- (d) 0.8 nmol PolB1 + 2.4 nmol PBP1
- (e) 0.8 nmol PolB1 + 2.4 nmol PBP2
- (f) 0.8 nmol PolB1 + 2.4 nmol PBP1 + 2.4 nmol PBP2
- (g) 0.8 nmol PolB1 + 0.6 nmol PBP1 + 0.6 nmol PBP2

```

ASAC_1192      1  --MEQ---GNLKEVTVE-FSGSRFRAFIDTSSGLLVCPIC-----RR
Desfe_0230    1  --MAYTWEPKWEPFEVN-VDGIVIKTCRDRTGLIACPICIHAVSSCLGGNPPENYQFEN
Saci_0746     1  MSSTRWTPKWKTVKIK-LNDKIDICFDEITKLYACPIC---APECKKGNTP----NYG
Ahos_0879     1  --MSTRWLPKWKVVKIN-VKQKEVEVCYDDDLKLYACPF---NPICKKGGIP----DYS
SSO0150      1  --MSTRWLPKWKAEID-YNNKVTVCYDEVTRLYVCPIC---SPNCAKGVST----DYS
Msed_0158     1  --MSSRWAPRWELIKIT-VNGROETVCYDQETKLYLCPRC---GPECLKGGIP----TSG
Igag_0095     1  --MSYGWEAKWIKKKFKVVGGLEVETCODLSTGLILCPLCTDISKICPSPTEPSSTPVSK
Hbut_1256     1  --MSLOWEPQWEETIE-VYGVRLKVPDRDVTGLYACPIC-----GFG----VDA
Pyrfu_1495    1  --MALQWEPQWEELVIE-KWGVKLVKVKDKVVTGMYACPIC-----GIS----DSA

ASAC_1192     37  T-RVTSPEDLVAHILAHAMK-SLDRREPPORAHV-----TSESSESE-----
Desfe_0230    58  S-YFFTVDDLISHLKTYHVR-GWHRRIESVA-----SKSSEED-----
Saci_0746     53  A-YFFSLDDLKEHVLISHNFS-YWLRKRKTEEEEEEEK---VKAEEEE-----
Ahos_0879     51  T-YFYHVEDLVSHIIAHKNA-LWLKKRPQEIREEEEEG---EEDNEED-----
SSO0150      51  T-YFFNLEDLKRHLDAHKYG-LWLQKKTRTEEEEEEPKLSIGEESEEE-----
Msed_0158     51  S-YFFNOODLLNHLLAHRYE-LWNKKKHKEVEEEEEEG---GEDEDEE-----
Igag_0095     59  GVYFFSIEDLYRHMIAHTRASEWGKYVTVGEEEGEEGD---EEEEELDTDTL
Hbut_1256     44  T-YFFSEKDLVIHILNHAKV-KRAERVKQIVPEGEPAE--EKLEEEED-----
Pyrfu_1495    44  I-YFFSIEDLLRHMLTHARR-ERIE TIRVSIIEEGEEGAK--LEEIGEEES-----

```

**Supplementary Figure 4. Sequence alignment of PBP1 proteins from various archaea.** The conserved putative zinc-coordinating residues are indicated by red asterisks. ASAC – *Acidilobus saccharovorans*; Desfe - *Desulfurococcus fermentans*; Saci - *Sulfolobus acidocaldarius*; Ahos – *Acidianus hospitalis*; SSO - *Sulfolobus solfataricus*; Msed - *Metallosphaera sedula*; Igag – *Ignicoccus aggregans*; Hbut – *Hyperthermus butylicus*; Pyrfu- *Pyrolobus fumarii*. The number refers to the open reading frame number in the genome annotations <sup>3</sup>.



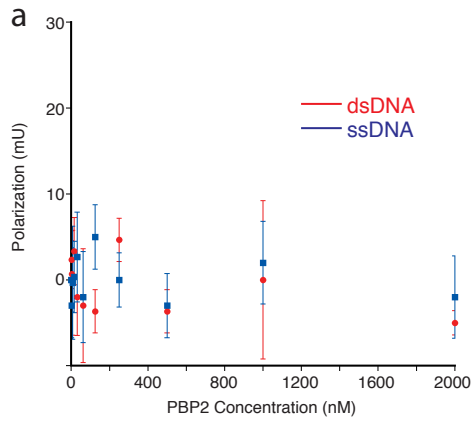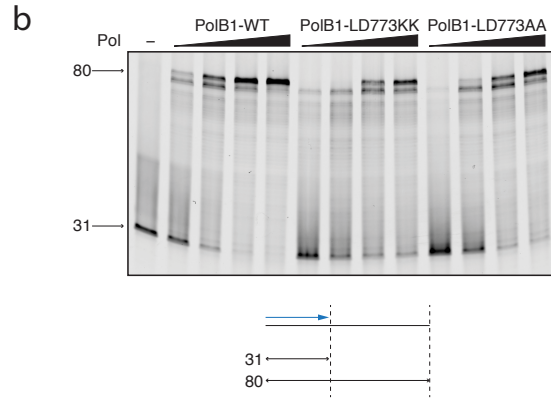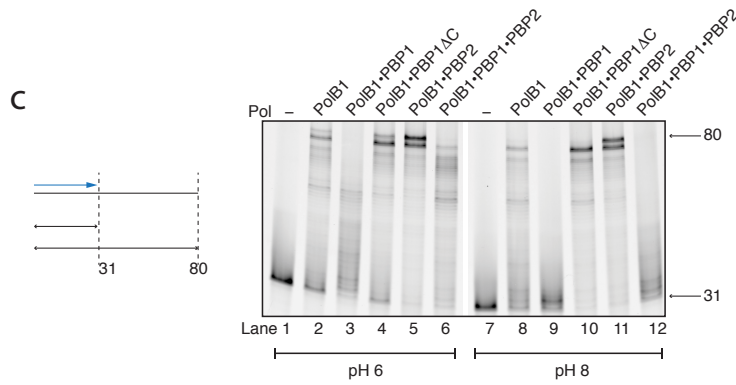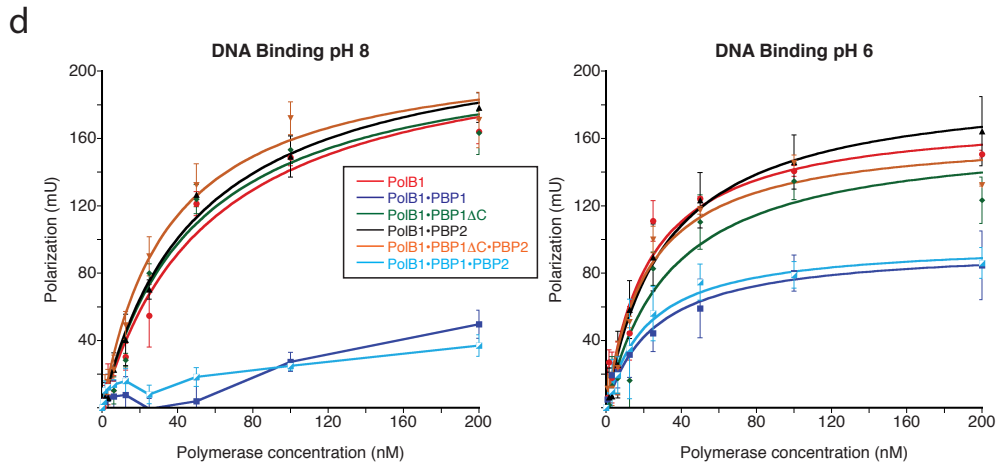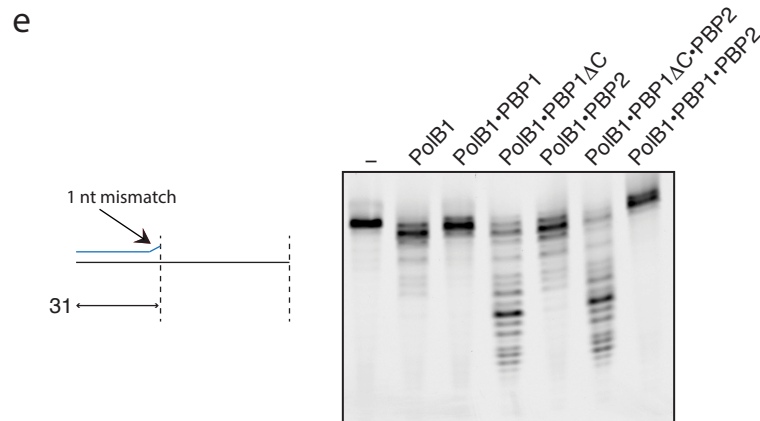

**Supplementary Figure 5. Biochemical characterizations of Holoenzyme and sub-complexes.**

(a) The ability of PBP2 to bind either single or double stranded DNA was assessed by fluorescence anisotropy measurements. Protein concentrations are a 2-fold dilution series from 2 $\mu$ M. Measurements were performed in triplicate and the error bars are +/-the standard deviation.

(b) Primer extension activity comparison between PolB1 and the thumb domain mutants. Reactions contained 5 nM, 10 nM, 20 nM, 40 nM of each enzyme and 50 nM DNA substrate.

(c) Polymerase activity comparison at pH 6 and 8. Substrate information is illustrated on the left, with the Cy5 labeled primer colored in blue (asterisk indicates the position of labeling). Reactions contained 20 nM enzymes and 50 nM DNA substrate and were incubated at 50 °C.

(d) DNA binding activity comparison at pH 8 and pH 6, determined by fluorescence anisotropy. Polymerase concentrations are 2-fold dilutions from 200 nM to 0.78 nM. Data were plotted using Kaleidagraph version 4.5 and fit to a single site binding model.

(e) Exonuclease activities of PolB1-HE and subassemblies on a DNA substrate with a primer/template containing a mismatch at the 3'-end of the primer. Reactions contained 1 M PolB1-HE and subcomplexes with 1 M DNA substrate. Reaction products were analyzed by denaturing PAGE. 'PBP1 $\Delta$ C' denotes PBP1 C-terminal tail deletion mutant.

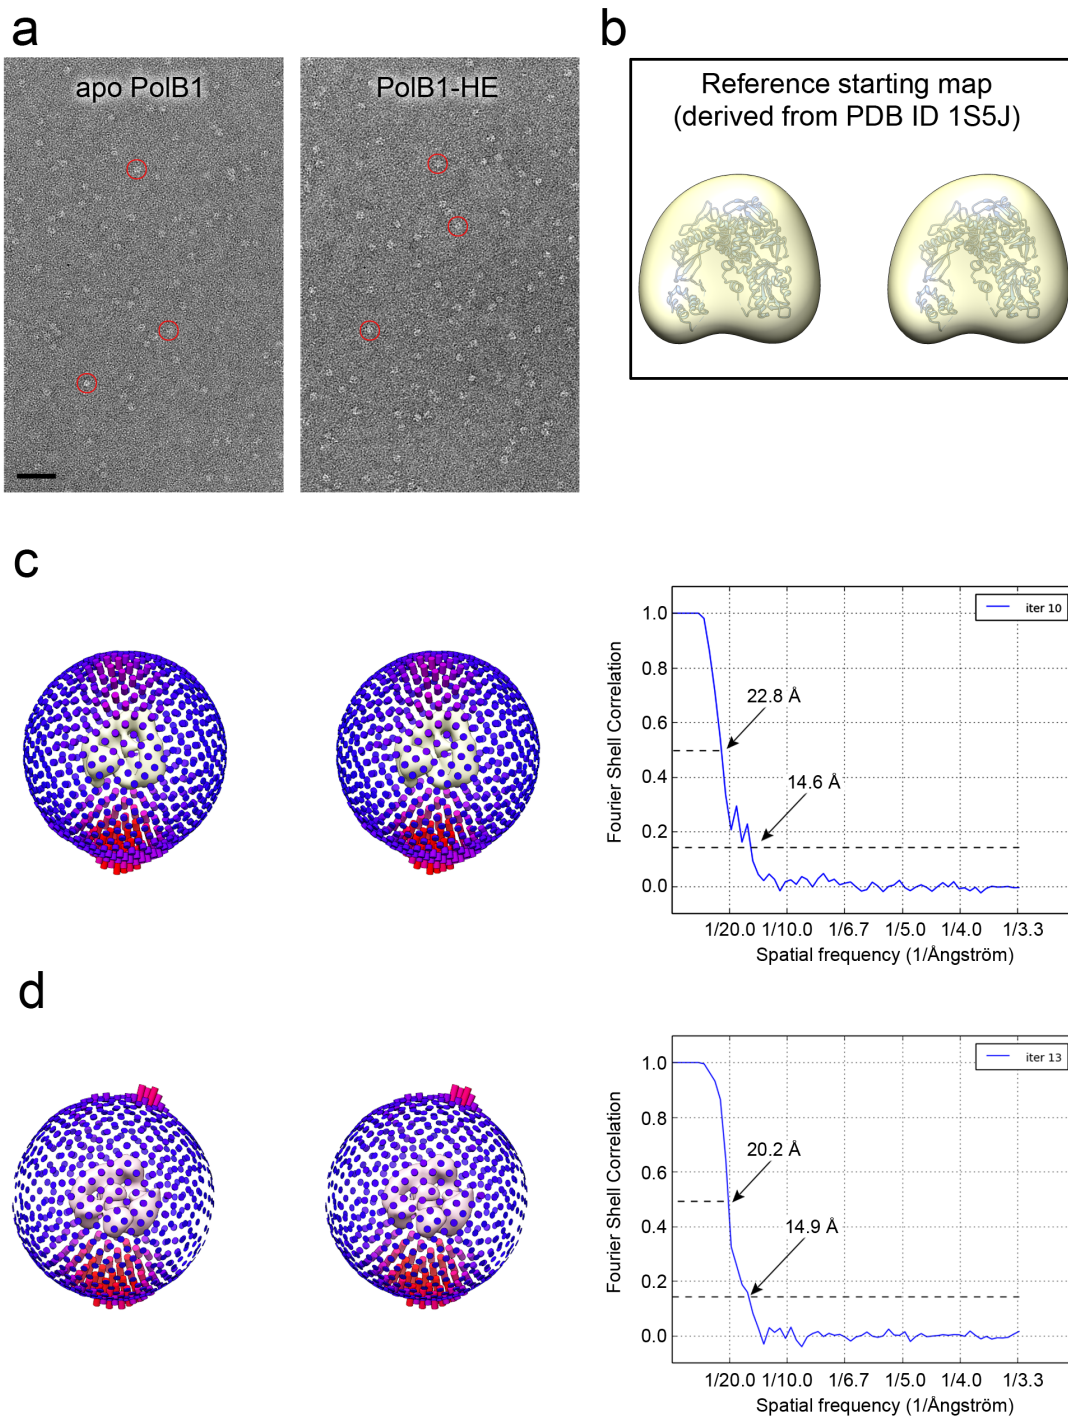

**Supplementary Figure 6. Negative stain image processing of apo-PolB1 and PolB1-HE.**

(a) Representative area from an electron micrograph recorded for apo-PolB1 (left) and holoenzyme PolB1-HE (right). Red circles mark some of the extracted particles. Scale bar 50 nm.

(b) Stereoview of the volume (semi-transparent yellow) calculated from the crystal structure of DNA PolB1 from *Sulfolobus solfataricus* (PDB ID 1S5J) filtered at 50

Å resolution (contoured at 0.05 threshold in Chimera) with the corresponding atomic model fitted as cartoon representation (colored light-blue).

(c) Left, stereoview of the angular coverage of the particles contributing to the 3D reconstruction for the apo-PolB1 (yellow density in the centre) from Relion and visualized in Chimera; the height of each cylinder relates with the number of particles at that Euler angle. Right, gold-standard Fourier Shell correlation from the last iteration of the auto-3d refinement in Relion and displayed in Scipion with the dashed lines crossing the FSC profile at 0.5 at 22.8 Å resolution and at 0.143 at 14.6 Å resolution respectively.

(d) As (c) but for PolB1-HE holoenzyme (pink density in the center) with FSC calculated at the converged iteration 13. The estimated resolution is 20.2 Å at 0.5 FSC criteria (14.9 Å at 0.143 FSC criteria).

a

|           |     |                                                                |
|-----------|-----|----------------------------------------------------------------|
| SSO PolB3 | 626 | SKDVKKAIKLVKSTVIKRRRGEFDNEELITWAKIERDLNEYNNQLP--FVTAARKAIQSGY  |
| SSO PolB2 | 483 | KKLR-----IRDLFEHYRKRAINGEPIDYVI-----WIKDVP-----                |
| ASA       | 852 | EKTLDLREKVOEIIYTKRRREYITLDQLAISVMMSKDPMEYKKNTPQHVKAALLLINEGV   |
| FFO       | 810 | LETQDKIKENVKKIYLLKLNMEYNLDELAFNVMNKKDVLEYKKNTPQHVKAALQLKPFNK   |
| IIS       | 810 | VETRERIKDLVQQLYVNLKQYYNLDEVAFFHMQLTKGLNEYNKNVPOHVKAARMLLKFGV   |
| IHO       | 786 | VKTREEVKNLVKELYMNLKROYDLDLAFHMQLTKPIESYTKNMPQHVKAAMKMLAKFGI    |
| TCE       | 733 | KEFEEWLRSEVKEKYVSLKRKEITLDQLTIRTGLTKKVEEYTKNTPQHVKAALQLKNYGI   |
| SMA       | 727 | KEFQEWLENEVKRLYRELKKEITLDQLAFKVGLTKSLNEYTKNKPQHVKAALQLKTYGY    |
| SHE       | 727 | KEFQEWLENEVKRLYRELKKEITLDQLAFKVGLTKSLNEYTKNKPQHVKAALQLKTYGY    |
| TAG       | 729 | IEFVKWLEHQVKTIIHNDIRRKEITLDRLAIRVALTKTPSLYTKTKPQHVKAALQLMNYGI  |
| DMU       | 732 | VSFANWLEDRLKEYYVGLKRRREVPDLRLAIRVALTKPPSSYTKTKPQHVRAAMQLANYGI  |
| DFE       | 731 | VVFVDWLRREMLKEYYDGLKRRREIPLDHLAIRVALTKPPSSYNKTKPQHVKAALQLIDYGI |
| DKA       | 731 | VVFVDWLRREMLKEYYDGLKRRREIPLDHLAIRVALTKPPSSYNKTKPQHVKAALQLIDYGI |
| PFU       | 858 | LVVKKKIRDKLHEVYKRLKEKDFMLDELAIHMALTKPVNEYA-NIPPHVRAAIQLMQAGV   |
| MYE       | 747 | EKAKQDLTVKVKEVYAKLRNKEYNLDELAFRVMLAKDPNSYEKNTPOHVKAARLLREFNV   |
| MCU       | 744 | EKAIADLTAQVKEVYRKLKSKKEYNLDELAFRVMLSKSVNSYDKNTPQHVKAALQLAELNI  |
| MSE       | 746 | EKAIQDLTAQVKEVYRKLKSKKEYNLDELAFRVMLSRDVKSYEKNTPOHVKAALQLAEMNV  |
| AHO       | 746 | EKVKKEVAEKVKSVDRLKSKKEYNLDELAFRVMLSKDLDSTYTKNTPQHVKAAMQLRALGI  |
| SSO PolB1 | 748 | KEIKRKIVDVVKGSYEKLKNGYNLDELAFRVMLSKPLDAYKKNTPQHVKAALQLRPFV     |
| SIS       | 748 | KEIKGKIVDVVKGSYEKLKNGYNLDELAFRVMLSKPLDAYKKNTPQHVKAALQLRPFV     |
| STO       | 746 | PKIRDQLEYKIKIYEKLRKGYNLDELAFRVMLSKPLESYTKNTPQHVKAALQLRSYGV     |
| SAC       | 746 | PEVKNKLEIKIKDIYNKLRKGYNLDELAFRVMLSKPLDSYTKNTPQHVKAGLQLRAFGV    |

b

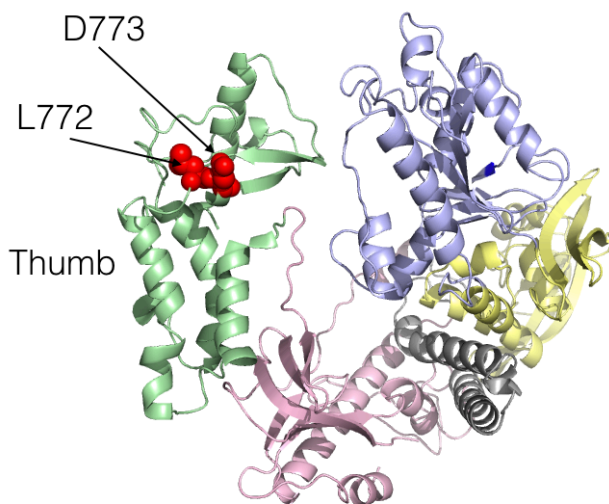

**Supplementary Figure 7. Basis of selection of L772 and D773 for mutagenesis**

(a) Sequence alignment of protein sequences in the vicinity of the knuckle of the PolB1 thumb domain from a range of members of the Sulfolobales and Desulfurococcales. The leucine and aspartate residues highlighted in red are absolutely conserved in PolB1 but not in PolB2 and PolB3. Accession numbers are given in Supplementary Table 4.

(b) Modeled crystal structure of PolB1 with the leucine and aspartate residues highlighted in part (a) shown in red.

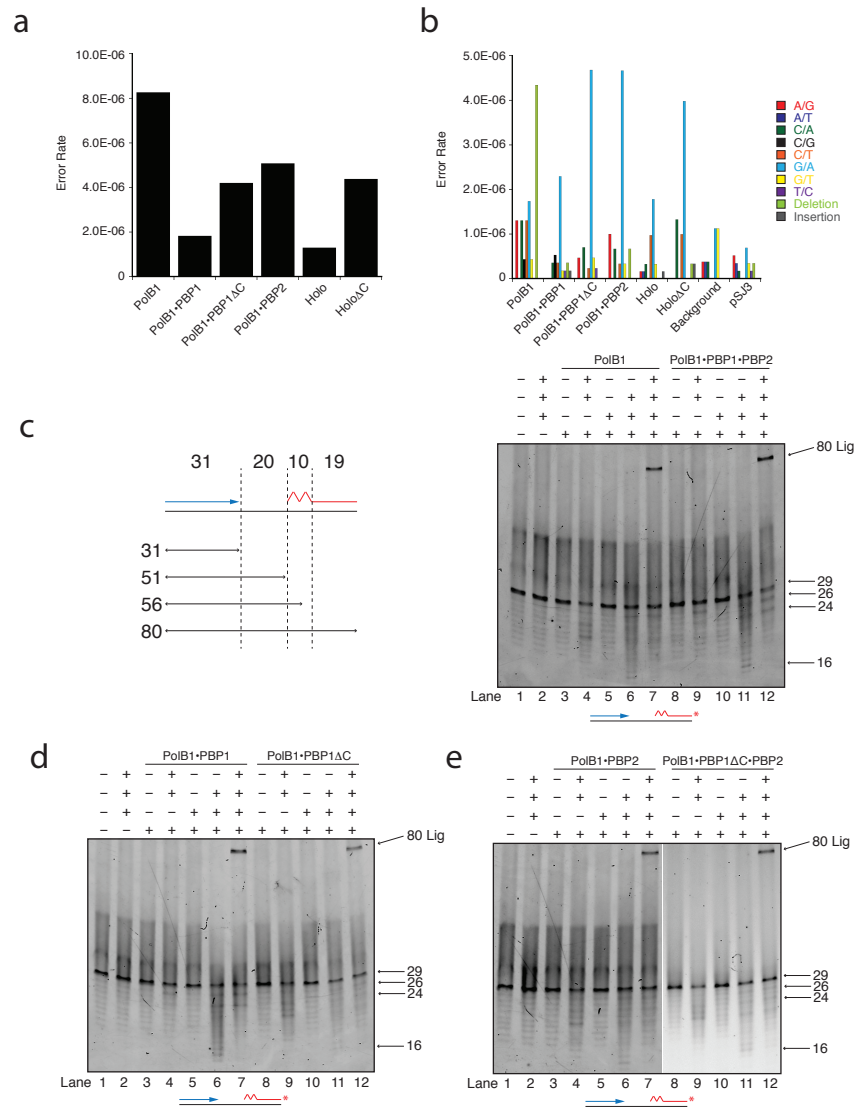

**Supplementary Figure 8. DNA polymerase fidelity and lagging strand processing mediated by PolB1 sub-assemblies.**

(a) General error rate comparison among PolB1-HE and sub-assemblies. Background mutation rate has been subtracted.

(b) Specific types of error rates generated by all enzymes. Different types of mutations are color-coded. ‘Background’ represents the error rates of gapped pSJ3 plasmid; ‘pSJ3’ represents the error rates of wild type pSJ3.

(c, d and e) The left panel of Figure S8C illustrates the lagging strand synthesis substrate illustration. Primer was labeled at the 5’ end with Cy5 and the downstream “Okazaki fragment” was labeled at the 3’ end with Cy3. Lengths of all the oligos and possible products are labeled. Reactions contained the indicated PolB1 sub-assemblies at 12.5 nM, 200 nM PCNA, 50 nM Fen1, 400 nM Lig1, and 50 nM double-labeled substrate. Reaction products were analyzed by denaturing PAGE. The gels were scanned twice using the Cy3 channel showing Fen1 degradation and Lig1 ligation products. Results for the Cy5 channel are in Figure 7. Notable product sizes are indicated on the right of the gel. The ligation product (80 Lig) is indicated.

|                                          | PolB1 N-terminus                                             | PBP1 | PBP2 |
|------------------------------------------|--------------------------------------------------------------|------|------|
| <i>Nitrososphaera gargensis</i> _c34170  | -----MPDRRKRLDDLPELP----                                     | No   | No   |
| <i>Cenarchaeum symbiosum</i> _1180       | -----                                                        | No   | No   |
| <i>Nitrosopumilus koreensis</i> _05375   | -----MQVNMGESKKIE-----TMP----                                | No   | No   |
| <i>Nitrosopumilus maritimus</i> _0948    | -----MQVNMEEETKKIE-----SMP----                               | No   | No   |
| <i>Korarchaeum cryptofilum</i> _1180     | -----MP----                                                  | No   | No   |
| <i>Thermofilum pendens</i> _0298         | -----MKP----                                                 | No   | No   |
| <i>Thermoproteus tenax</i> _0168         | -----MAFEEEEFIEEEEVRESEEEVAEYRIKGAALSASIP----                | No   | No   |
| <i>Thermoproteus uzoniensis</i> _1178    | -----MAFEEEEFLEEGEIREFEGEVAEFKIKGAVSTSIP----                 | No   | No   |
| <i>Pyrobaculum calidifontis</i> _1087    | -----MENEFEEEEVEVEYEGEAIESKLGVVSVTIP----                     | No   | No   |
| <i>Thermoproteus neutrophilus</i> _1361  | -----MAFEEENFEFEEVKEYEGEAIIEGKIKGVVSNISIP----                | No   | No   |
| <i>Pyrobaculum aerophilum</i> _2180      | -----MAFEEEDFEFQEVEVEYEGEAIIEGKIKGVVTSVP----                 | No   | No   |
| <i>Pyrobaculum arsenaticum</i> _0798     | -----MEFEEEFEEVEEVEYEGEAIIEGKIKGVVSNITIP----                 | No   | No   |
| <i>Pyrobaculum oguniense</i> _1534       | -----MVFEFEFEEVEEVEYEGEAIIEGKIKGVVSNITIP----                 | No   | No   |
| <i>Caldivirga maquilingensis</i> _0144   | -----MPKDELKIEEEEEVEESSEYIQESAITAETPTSTP----                 | No   | No   |
| <i>Vulcanisaeta distributa</i>           | -----MRSKEYREEEEELEEEFEEREEEEEEIITIKAEPTQNTP----             | No   | No   |
| <i>Vulcanisaeta moutnovskia</i>          | -----MRSKEDEEEEIEEEFEEREEEEEEIITIKAEPTQNTP----               | No   | No   |
| <i>Aeropyrum camini</i> _0076            | -----MKDSGRKRTTLEESLLSYIRTVRIKGGAGGALDDRGRSIDSEDEDKT         | YES  | YES  |
| <i>Aeropyrum pernix</i> _0099            | -----MRVRRGQEAADKETSLSDEERGRRLRQTLLDYMAGPAKP----             | YES  | YES  |
| <i>Acidilobus saccharovorans</i> _0130   | -----MALRNDGSPQAGGQGRANEGRSSAASAKSEKGGGNDRAPAKQPQSQKQP-EP    | YES  | YES  |
| <i>Caldisphaera lagunensis</i> _1108     | -----LQEIKVEMIDKDKNKIINKEDKNYDIINKN----                      | YES  | YES  |
| <i>Fervidicoccus fontis</i> _0875        | MAMATLKRDRKENGPTLDFINSSNKEKTANNFAEDLTYNQDKEEKDHEDVQKL----    | YES  | YES  |
| <i>Ignicoccus hospitalis</i> _0690       | -----MKKPRRGPITLDFLKQKQANDGSKALKAPKPEEKAPKRPLEGAEK----       | YES  | YES  |
| <i>Thermogladius</i> _sp_0422            | -----MKYSKIGDVYTLDFDRYVSTLDS----                             | YES  | YES  |
| <i>Staphylothermus hellenicus</i> _1596  | -----MKYSIIGNVYRLYDVNKVDFIGK----                             | YES  | YES  |
| <i>Staphylothermus marinus</i> _0872     | -----MKYNIIGDVYRLYDVNKVDFIDK----                             | YES  | YES  |
| <i>Thermosphaera aggregans</i> _1324     | -----MRIISKIGYVASLPSETYEKVLSK----                            | YES  | YES  |
| <i>Desulfurococcus mucosus</i> _1305     | -----MTYMGEPQPPGFIDRSSYKALSKEP----                           | YES  | YES  |
| <i>Desulfurococcus fermentans</i> _1409  | -----MRSMILLHVKESTSYKVLSPK----                               | YES  | YES  |
| <i>Desulfurococcus kamchatkensis</i> _13 | -----MDTPLHVKESTSYKVLSPK----                                 | YES  | YES  |
| <i>Ignicoccus aggregans</i> _1176        | -----MARQKSIYEFLLKKE TAKNSDRKPI SKDGEQNNIEIHGSFSND----       | YES  | YES  |
| <i>Metallosphaera cuprina</i> _0378      | -----MVKQLTLTEFSLPERKMDKIEGKSKEEYIEEP----                    | YES  | YES  |
| <i>Metallosphaera sedula</i> _1907       | -----MSIMARQLTLADFSGIKKEEPVKQEEKTQEEERLPERP----              | YES  | YES  |
| <i>Acidianus hospitalis</i> _1186        | -----MLKEYFFHLYNVAKQITLDFFSIKQETHSEKGVKEKEEVQQL----          | YES  | YES  |
| <i>Sulfolobus solfataricus</i> _0552     | -----MTKQLTLFDIPSSKPAKSEQNTQQSQSQSAPVE----                   | YES  | YES  |
| <i>Sulfolobus acidocaldarius</i> _1537   | -----MSKQATLDFDSIKKNEKQNTQESVVEVPKQT----                     | YES  | YES  |
| <i>Sulfolobus tokodaii</i> _1426         | -----MARQITLDFDTLKKQNKDESKREIIPHANIN----                     | YES  | YES  |
| <i>Hyperthermus butylicus</i> _1274      | -----MQRYFDESRLRELLTEIRSSRNEANRAGEGARSEKRLSTSVSDNIAD----     | YES  | YES  |
| <i>Pyrolobus fumarii</i> _1718           | MARQSTLLEFLNASKRAKRAAGAGSSPKGTRDTSRKEGGENREKRGEDRNLLLEML---L | YES  | YES  |

### Supplementary Figure 9. PolB1 in Thermoproteales has an acidic N-terminal tail.

Comparison of the sequences of the N-terminal regions of PolB1 orthologs from the indicated archaeal species. Full PolB1 sequences were aligned using MUSCLE<sup>4</sup>, for clarity only the N-terminal regions are shown. Glutamic acid residues are highlighted in red. See also Supplementary Fig. 2 and Fig. 1.

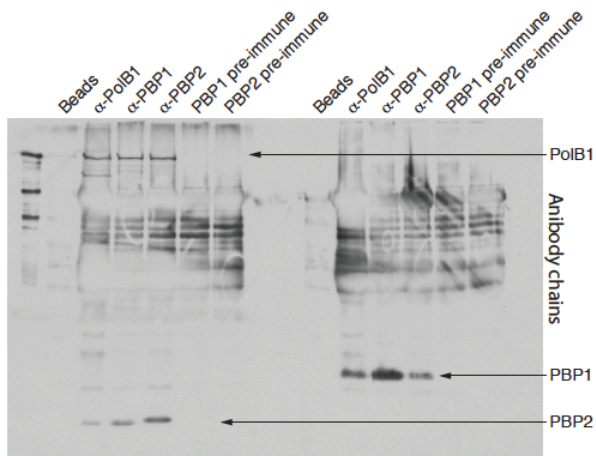

Figure 1b full gel

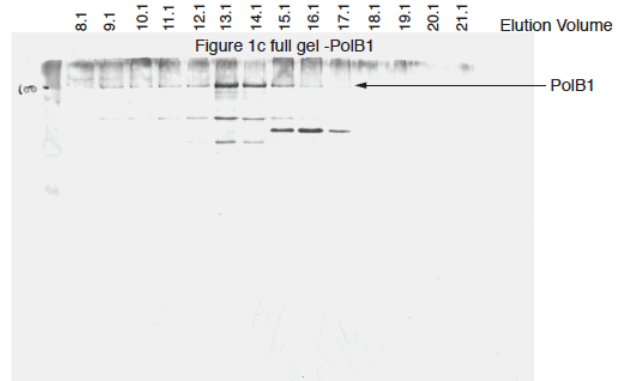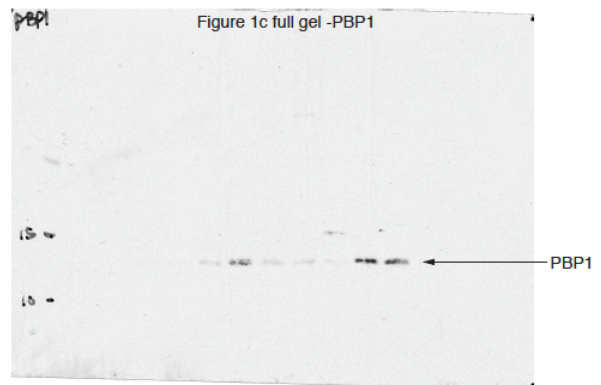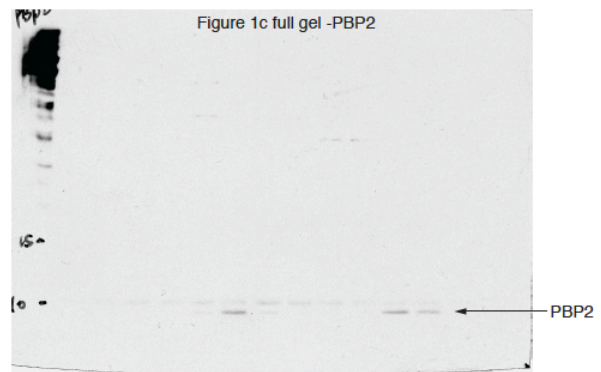

Figure 1c full gel

**Supplementary Figure 10. Full membrane images of the cropped western blots presented in Figures 1b and 1c.**



## Supplementary references

- 1) Dereeper, A. *et al.*,. Phylogeny.fr: robust phylogenetic analysis for the non-specialist. *Nucleic Acids Res.* **36**, W465-9. (2008)
- 2) Dereeper, A., Audic, S., Claverie, J.M., Blanc, G. BLAST-EXPLORER helps you building datasets for phylogenetic analysis. *BMC Evol. Biol.* **10**,8. (2010)
- 3) <http://www-archbac.u-psud.fr/projects/sulfolobus/>
- 4) <http://www.ebi.ac.uk/Tools/msa/muscle/>
